# Supplementary material for: Dietary determinants of postprandial blood glucose control in adults with type 1 diabetes on a hybrid closed-loop system
Source: PubMed Central journal article supplement (PMC8660714; doi:10.1007/s00125-021-05587-0), 2021-10-23
Supplement: 125_2021_5587_MOESM1_ESM.pdf [file 125_2021_5587_MOESM1_ESM.pdf]

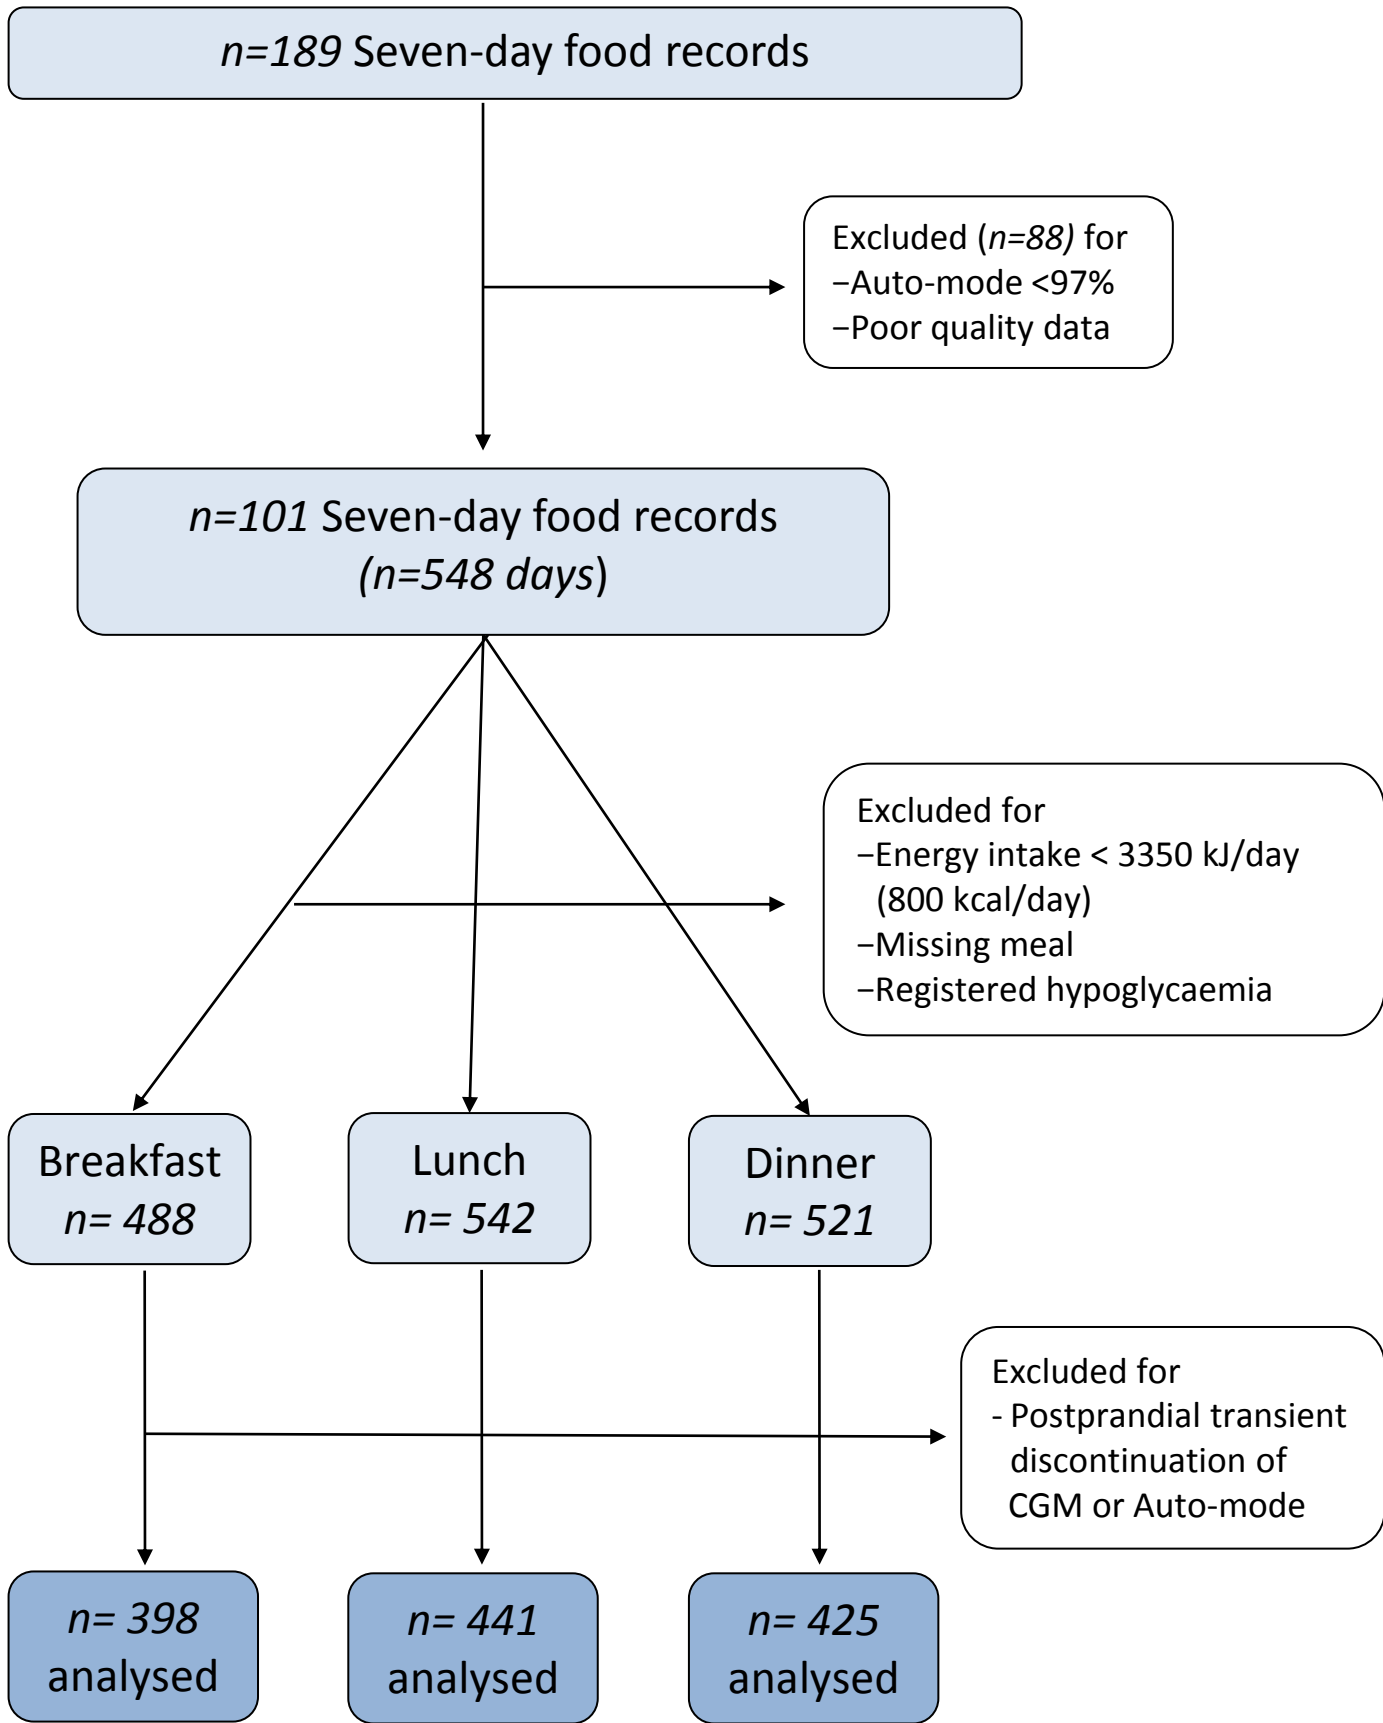

ESM Figure 1. Flow chart of 7-day food records retrieval and selection strategy for the identification of meals to be included in the analyses.
